# Supplementary material for: Performance of DNA methylation analysis of ASCL1, LHX8, ST6GALNAC5, GHSR, ZIC1 and SST for the triage of HPV‐positive women: Results from a Dutch primary HPV‐based screening cohort
Source: PubMed Central journal article supplement — Int J Cancer. 2021 Oct 13;150(3):440–9. doi: 10.1002/ijc.33820 (PMC9293097; doi:10.1002/ijc.33820), 2021-10-13

1 **Performance of DNA methylation analysis of *ASCL1*, *LHX8*, *ST6GALNAC5*,**  
2 ***GHSR*, *ZIC1* and *SST* for the triage of HPV-positive women: results from a**  
3 **Dutch primary HPV-based screening cohort.**

4

5 Lianne Verhoef, Maaïke C.G. Bleeker, Nicole Polman, Renske D.M. Steenbergen, Chris J.L.M.  
6 Meijer, Willem J.G. Melchers, Ruud L. Bekkers, Anco C. Molijn, Wim G. Quint, Folkert J. van  
7 Kemenade, Johannes Berkhof, Daniëlle A.M. Heideman

8

9 **Table of contents**

10

11 **Table legends**

12 **Supplementary Table 1.** Original diagnosis versus revision diagnosis

13 **Supplementary Table 2.** Sensitivity and specificity of baseline cytology, genotyping and *ASCL1/LHX8*  
14 methylation for detection of CIN3+ and CIN2+ - subgroup with revision diagnosis

15 **Supplementary Table 3.** Sensitivity and specificity of *ASCL1/LHX8* and HPV16/18 genotyping for  
16 detection of CIN3+, stratified by cytology class – subgroup with revision diagnosis

17

18

19 **Figures legends**

20 **Supplementary Figure 1. Methylation levels increase with severity of underlying cervical disease**

21 **– subgroup with revision diagnosis.** DNA methylation levels of *ASCL1* (A), *LHX8* (B), *ST6GALNAC5*  
22 (C), *GHSR* (D), *ZIC1* (E) and *SST* (F) represented by the square-root transformed Cq-ratios (y-axis) in  
23 the different histology categories (x-axis). Differences between histological categories upon Kruskal-  
24 Wallis omnibus test, followed by post hoc testing using the Wilcoxon rank-sum test and Bonferroni  
25 multiple testing correction: \*, p-value <0.05; \*\*, p-value <0.01; \*\*\*, p-value <0.001; NS, not significant. ○  
26 outlier sample. Abbreviations: CIN, cervical intraepithelial neoplasia; CxCa, cervical carcinoma; no CIN,  
27 women with no histology or normal histology.

28

29 **Supplementary Figure 2. Diagnostic accuracy – subgroup with revision diagnosis.** ROC curves

30 and corresponding AUC for CIN3+ detection for (A) single marker classifiers *ASCL1*, *LHX8*,  
31 *ST6GALNAC5*, *GHSR*, *ZIC1*, *SST*; and (B) bi-marker panel *ASCL1/LHX8* (black line), including point  
32 estimates of cytology (red circle), HPV16/18 genotyping (green circle) and bi-marker panel  
33 *ASCL1/LHX8* with the predefined threshold calibrated at 70% clinical specificity (yellow circle). For  
34 comparison, the cross-validated ROC curve and corresponding AUC, as obtained in the hrHPV-  
35 positive training series is projected (grey line) [10]. Abbreviations: AUC, area under the curve; CIN,  
36 cervical intraepithelial neoplasia; ROC, receiver operating characteristic.

37

**Supplementary Table 1.** Original diagnosis versus revision diagnosis

|                    |                 | Revision diagnosis* |      |      |      |                 | Total |
|--------------------|-----------------|---------------------|------|------|------|-----------------|-------|
|                    |                 | No dysplasia        | CIN1 | CIN2 | CIN3 | Cervical cancer |       |
| Original diagnosis | No dysplasia    | 55                  | 23   | 1    | 1    | 0               | 80    |
|                    | CIN1            | 33                  | 59   | 17   | 2    | 0               | 111   |
|                    | CIN2            | 16                  | 17   | 14   | 11   | 0               | 58    |
|                    | CIN3            | 4                   | 0    | 23   | 56   | 0               | 83    |
|                    | Cervical cancer | 0                   | 0    | 0    | 0    | 3               | 3     |
|                    | Total           | 108                 | 99   | 55   | 70   | 3               | 335   |

\*) revision diagnosis based on morphologic features combined with the interpretation of the p16INK4A and Ki-67 immunostainings, except for n = 57 based on morphologic features only.

**ICC:** 0.944 (95% CI 0.935-0.952)

Abbreviations: CIN1-3, cervical intraepithelial neoplasia grade 1-3;

Supplementary Table 2.

| A        | Cytology                                               | Sensitivity |       |               | Specificity |       |              | PPV   |              | NPV   |               |
|----------|--------------------------------------------------------|-------------|-------|---------------|-------------|-------|--------------|-------|--------------|-------|---------------|
|          |                                                        | n/N         | %     | 95% CI        | n/N         | %     | 95% CI       | %     | 95% CI       | %     | 95% CI        |
|          | CIN3+                                                  | 65/73       | 89.0% | (81.9-96.2%)  | 382/609     | 62.7% | (58.9-66.6%) | 22.3% | (17.5-27.0%) | 97.9% | (96.5-99.4%)  |
|          | CIN2+                                                  | 111/128     | 86.7% | (80.0-92.6%)  | 373/554     | 67.3% | (63.4-71.2%) | 38.0% | (32.4-43.6%) | 95.6% | (93.6-97.7%)  |
| <b>B</b> | <b>HPV16/18 genotyping</b>                             |             |       |               |             |       |              |       |              |       |               |
|          | CIN3+                                                  | 46/64       | 71.9% | (60.9-82.9%)  | 369/555     | 66.5% | (62.6-70.4%) | 19.8% | (14.7-25.0%) | 95.3% | (93.3-97.4%)  |
|          | CIN2+                                                  | 75/116      | 64.7% | (56.0-73.4%)  | 346/503     | 68.8% | (64.7-72.8%) | 32.3% | (26.3-38.3%) | 89.4% | (86.3-92.5%)  |
| <b>C</b> | <b>ASCL1 / LHX8 methylation*</b>                       |             |       |               |             |       |              |       |              |       |               |
|          | CIN3+                                                  | 57/73       | 78.1% | (68.6-87.6%)  | 455/609     | 74.7% | (71.3-78.2%) | 27.0% | (21.0-33.0%) | 96.6% | (95.0-98.2%)  |
|          | CIN2+                                                  | 86/128      | 67.2% | (59.1-75.3%)  | 429/554     | 77.4% | (74.0-80.9%) | 40.8% | (34.1-47.4%) | 91.1% | (88.5-93.7%)  |
| <b>D</b> | <b>Cytology + HPV16/18 genotyping</b>                  |             |       |               |             |       |              |       |              |       |               |
|          | CIN3+                                                  | 61/64       | 95.3% | (90.1-100.5%) | 240/555     | 43.2% | (39.1-47.4%) | 16.2% | (12.5-19.9%) | 98.8% | (97.4-100.2%) |
|          | CIN2+                                                  | 109/116     | 94.0% | (89.6-98.3%)  | 236/503     | 46.9% | (42.6-51.3%) | 29.0% | (24.4-33.6%) | 97.1% | (95.0-99.2%)  |
| <b>E</b> | <b>ASCL1 / LHX8 methylation* + HPV16/18 genotyping</b> |             |       |               |             |       |              |       |              |       |               |
|          | CIN3+                                                  | 57/64       | 89.1% | (81.4-96.7%)  | 282/555     | 50.8% | (46.7-55.0%) | 17.3% | (13.2-21.4%) | 97.6% | (95.8-99.4%)  |
|          | CIN2+                                                  | 96/116      | 82.8% | (75.9-89.6%)  | 269/503     | 53.5% | (49.1-57.8%) | 29.1% | (24.2-34.0%) | 93.1% | (90.2-96.0%)  |

\* using a predefined threshold (70% specificity)

Abbreviations: CI, confidence interval; CIN, cervical intraepithelial neoplasia; n, number of; N, group size; NPV, negative predicted value; PPV, positive predicted value

Supplementary Table 3.

| A        | ASCL1 / LHX8 methylation*                              | Sensitivity |       |               | Specificity |       |              | PPV   |              | NPV   |               | Relative risk |              |
|----------|--------------------------------------------------------|-------------|-------|---------------|-------------|-------|--------------|-------|--------------|-------|---------------|---------------|--------------|
|          |                                                        | n/N         | %     | 95% CI        | n/N         | %     | 95% CI       | %     | 95% CI       | %     | 95% CI        |               | 95% CI       |
| CIN3+    | NILM                                                   | 5/8         | 62.5% | (29.0-96.0%)  | 294/382     | 77.0% | (72.7-81.2%) | 5.4%  | (0.8-10.0%)  | 99.0% | (97.9-100.1%) | 5.32          | (1.30-21.85) |
|          | low-grade cytology                                     | 9/15        | 60.0% | (35.2-84.8%)  | 140/183     | 76.5% | (70.4-82.6%) | 17.3% | (7.0-27.6%)  | 95.9% | (92.7-99.1%)  | 4.21          | (1.58-11.26) |
|          | high-grade cytology                                    | 43/50       | 86.0% | (76.4-95.6%)  | 21/44       | 47.7% | (33.0-62.5%) | 65.2% | (53.7-76.6%) | 75.0% | (59.0-91.0%)  | 2.61          | (1.34-5.07)  |
| CIN2+    | NILM                                                   | 9/17        | 52.9% | (29.2-76.7%)  | 289/373     | 77.5% | (73.2-81.7%) | 9.7%  | (3.7-15.7%)  | 97.3% | (95.5-99.1%)  | 3.59          | (1.43-9.05)  |
|          | low-grade cytology                                     | 17/38       | 44.7% | (28.9-60.5%)  | 125/160     | 78.1% | (71.7-84.5%) | 32.7% | (19.9-45.4%) | 85.6% | (79.9-91.3%)  | 2.27          | (1.30-3.96)  |
|          | high-grade cytology                                    | 60/73       | 82.2% | (73.4-91.0%)  | 15/21       | 71.4% | (52.1-90.8%) | 90.9% | (84.0-97.8%) | 53.6% | (35.1-72.0%)  | 1.96          | (1.31-2.94)  |
| <b>B</b> | <b>HPV16/18 genotyping</b>                             |             |       |               |             |       |              |       |              |       |               |               |              |
| CIN3+    | NILM                                                   | 5/8         | 62.5% | (29.0-96.0%)  | 240/347     | 69.2% | (64.3-74.0%) | 4.5%  | (0.6-8.3%)   | 98.8% | (97.4-100.2%) | 3.62          | (0.88-14.87) |
|          | low-grade cytology                                     | 8/15        | 53.3% | (28.1-78.6%)  | 111/168     | 66.1% | (58.9-73.2%) | 12.3% | (4.3-20.3%)  | 94.1% | (89.8-98.3%)  | 2.07          | (0.79-5.46)  |
|          | high-grade cytology                                    | 33/41       | 80.5% | (68.4-92.6%)  | 18/40       | 45.0% | (29.6-60.4%) | 60.0% | (47.1-72.9%) | 69.2% | (51.5-87.0%)  | 1.95          | (1.05-3.61)  |
| CIN2+    | NILM                                                   | 10/17       | 58.8% | (35.4-82.2%)  | 236/338     | 69.8% | (64.9-74.7%) | 8.9%  | (3.6-14.2%)  | 97.1% | (95.0-99.2%)  | 0.63          | (0.24-1.62)  |
|          | low-grade cytology                                     | 19/37       | 51.4% | (35.2-67.5%)  | 100/146     | 68.5% | (61.0-76.0%) | 29.2% | (18.2-40.3%) | 84.7% | (78.3-91.2%)  | 1.92          | (1.08-3.39)  |
|          | high-grade cytology                                    | 46/62       | 74.2% | (63.3-85.1%)  | 10/19       | 52.6% | (30.2-75.1%) | 83.6% | (73.9-93.4%) | 38.5% | (19.8-57.2%)  | 1.36          | (0.98-1.88)  |
| <b>C</b> | <b>ASCL1 / LHX8 methylation* + HPV16/18 genotyping</b> |             |       |               |             |       |              |       |              |       |               |               |              |
| CIN3+    | NILM                                                   | 7/8         | 87.5% | (64.6-110.4%) | 185/347     | 53.3% | (48.1-58.6%) | 4.1%  | (1.1-7.1%)   | 99.5% | (98.4-100.5%) | 7.70          | (0.96-61.97) |
|          | low-grade cytology                                     | 12/15       | 80.0% | (59.8-100.2%) | 87/168      | 51.8% | (44.2-59.3%) | 12.9% | (6.1-19.7%)  | 96.7% | (93.0-100.4%) | 3.87          | (1.13-13.26) |
|          | high-grade cytology                                    | 38/41       | 92.7% | (84.7-100.7%) | 10/40       | 25.0% | (11.6-38.4%) | 55.9% | (44.1-67.7%) | 76.9% | (54.0-99.8%)  | 0.72          | (0.21-2.48)  |
| CIN2+    | NILM                                                   | 13/17       | 76.5% | (56.3-96.6%)  | 182/338     | 53.8% | (48.5-59.2%) | 7.7%  | (3.7-11.7%)  | 97.8% | (95.8-99.9%)  | 3.58          | (1.19-10.76) |
|          | low-grade cytology                                     | 26/37       | 70.3% | (55.5-85.0%)  | 79/146      | 54.1% | (46.0-62.2%) | 28.0% | (18.8-37.1%) | 87.8% | (81.0-94.5%)  | 2.29          | (1.20-4.35)  |
|          | high-grade cytology                                    | 57/62       | 91.9% | (85.2-98.7%)  | 8/19        | 42.1% | (19.9-64.3%) | 83.8% | (75.1-92.6%) | 61.5% | (35.1-88.0%)  | 2.18          | (1.09-4.37)  |

\* using a predefined threshold (70% specificity)

Low-grade cytology: BMD equaling ASC-US/ASC-H/LSIL

High-grade cytology: &gt;BMD equaling HSIL

Abbreviations: ASCUS, atypical squamous cells of undetermined significance; ASC-H, atypical squamous cells that cannot exclude high-grade squamous intraepithelial lesions; CI, confidence interval; CIN, cervical intraepithelial neoplasia; HPV, human papillomavirus; HSIL, high-grade squamous intraepithelial lesions; LSIL, low-grade squamous intraepithelial lesions; n, number of; N, group size; NILM, negative for intraepithelial lesion or malignancy; NPV, negative predicted value; PPV, positive predicted value

**Supplementary Figure 1. Methylation levels increase with severity of underlying cervical disease – subgroup with revision diagnosis.** DNA methylation levels of *ASCL1* (A), *LHX8* (B), *ST6GALNAC5* (C), *GHSR* (D), *ZIC1* (E) and *SST* (F) represented by the square-root transformed Cq-ratios (y-axis) in the different histology categories (x-axis). Differences between histological categories upon Kruskal-Wallis omnibus test, followed by post hoc testing using the Wilcoxon rank-sum test and Bonferroni multiple testing correction: \*, p-value <0.05; \*\*, p-value <0.01; \*\*\*, p-value <0.001; NS, not significant. ○ outlier sample. Abbreviations: CIN, cervical intraepithelial neoplasia; CxCa, cervical carcinoma; no CIN, women with no histology or normal histology.

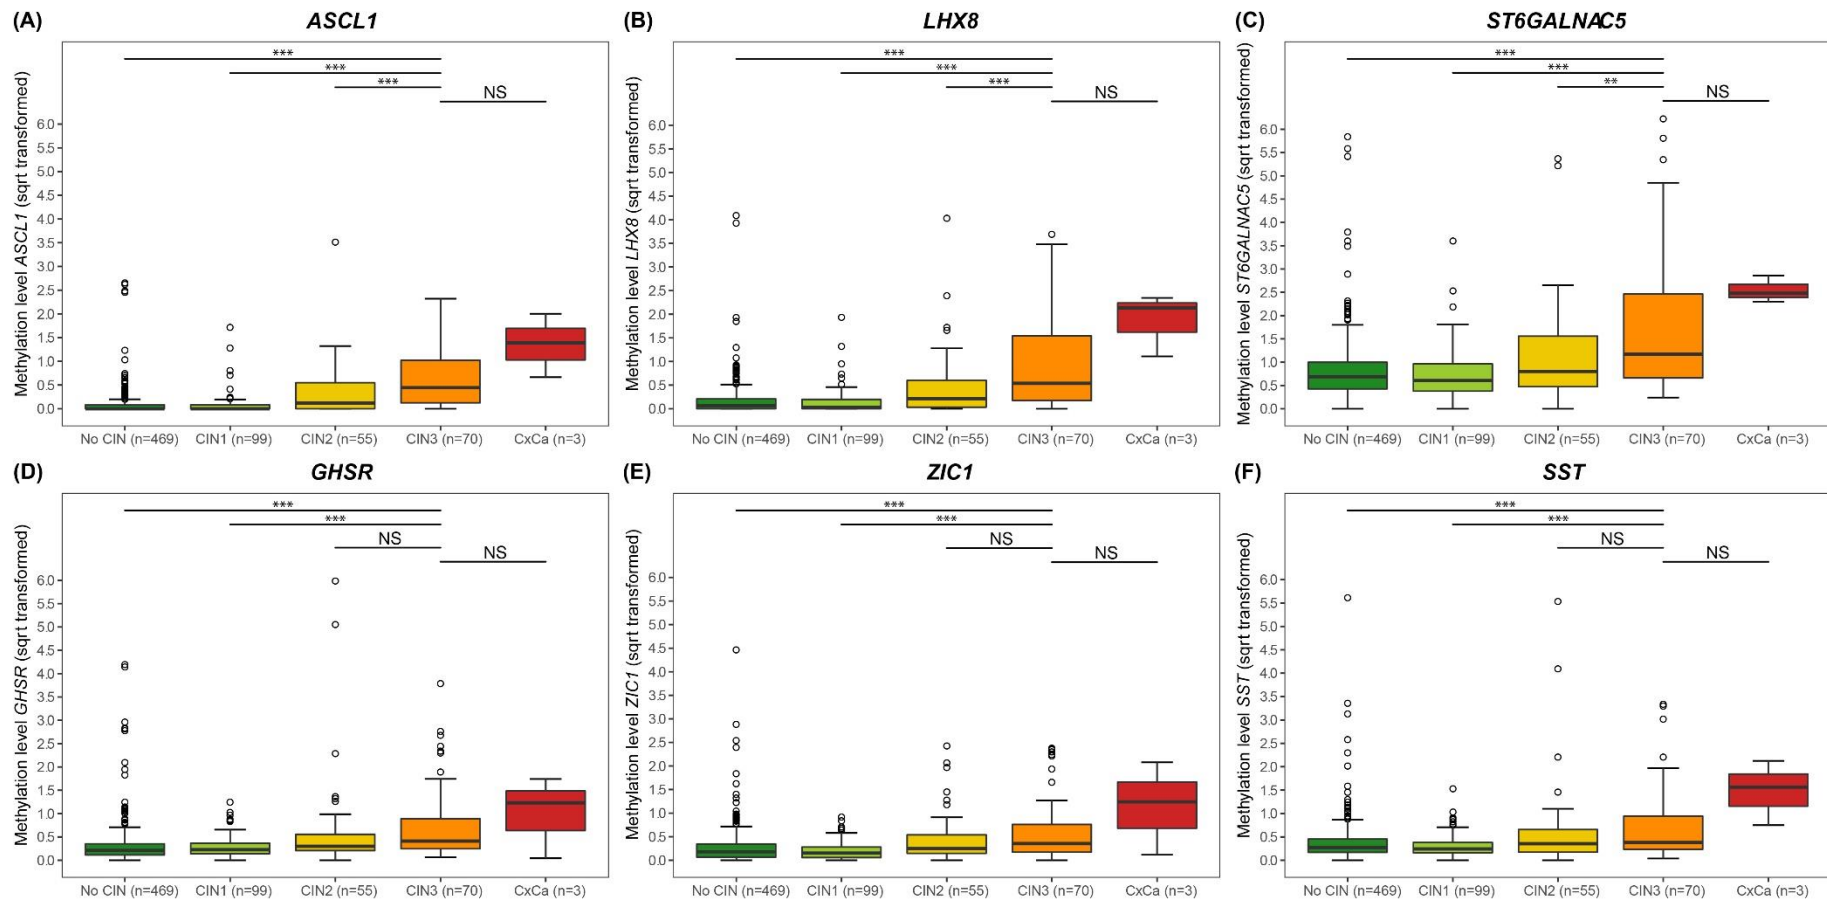

**Supplementary Figure 2. Diagnostic accuracy – subgroup with revision diagnosis.** ROC curves and corresponding AUC for CIN3+ detection for (A) single marker classifiers *ASCL1*, *LHX8*, *ST6GALNAC5*, *GHSR*, *ZIC1*, *SST*; and (B) bi-marker panel *ASCL1/LHX8* (black line), including point estimates of cytology (red circle), HPV16/18 genotyping (green circle) and bi-marker panel *ASCL1/LHX8* with the predefined threshold calibrated at 70% clinical specificity (yellow circle). For comparison, the cross-validated ROC curve and corresponding AUC, as obtained in the hrHPV-positive training series is projected (grey line) [10]. Abbreviations: AUC, area under the curve; CIN, cervical intraepithelial neoplasia; ROC, receiver operating characteristic.

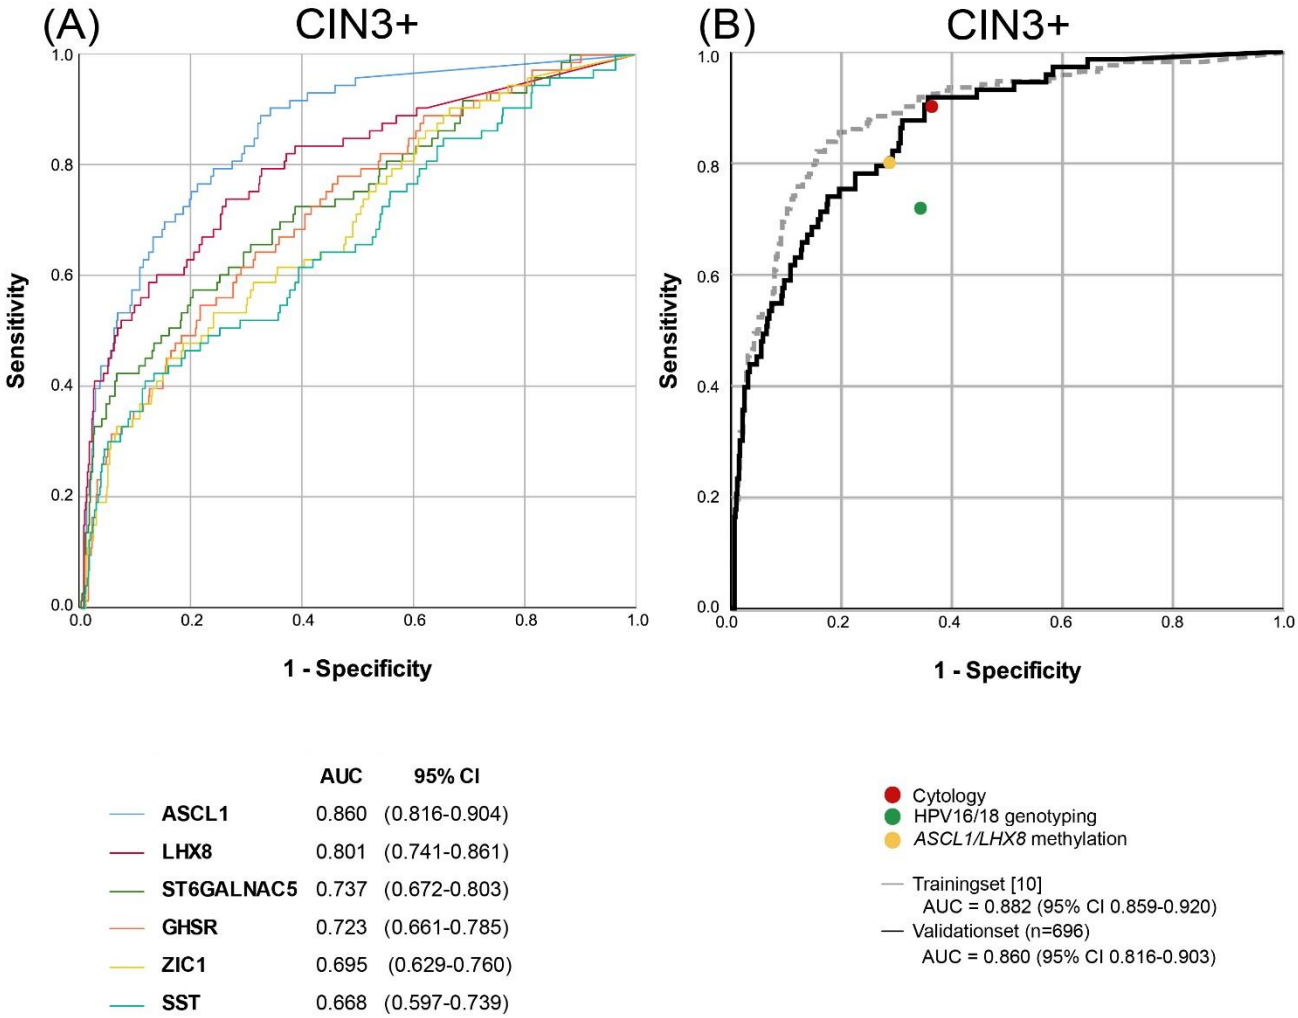

Supplement: IJC-150-440-s001.pdf [file IJC-150-440-s001.pdf]
